# Supplementary material
Source: publisher site journal article supplement (https://www.dovepress.com/article/419892)
Supplement: Supplementary file 1 [file get_supplementary_file.php]

**Supplementary Tables**

**Supplementary Table 1** Cohen's kappa statistics on top 10 bacterium to examine the results’ concordance between mNGS and CMT.

| ***Acinetobacter baumannii*** | | |  | ***Enterococcus faecium*** | | |
| --- | --- | --- | --- | --- | --- | --- |
|  | **CMT-** | **CMT+** |  |  | **CMT-** | **CMT+** |
| **mNGS-** | 138 | 6 |  | **mNGS-** | 170 | 1 |
| **mNGS+** | 9 | 27 |  | **mNGS+** | 9 | 0 |
| Kappa value=0.731, *P*=8.87e-23 | | | | Kappa value=-0.010, *P*=0.818 | | |
|  |  |  |  |  |  |  |
| ***Corynebacterium striatum*** | | |  | ***Mycobacterium tuberculosis*** | | |
|  | **CMT-** | **CMT+** |  |  | **CMT-** | **CMT+** |
| **mNGS-** | 142 | 1 |  | **mNGS-** | 172 | 0 |
| **mNGS+** | 32 | 5 |  | **mNGS+** | 6 | 2 |
| Kappa value=0.186, *P*=1.087e-4 | | | | Kappa value=0.389, *P*=4.276E-11 | | |
|  |  |  |  |  |  |  |
| ***Klebsiella pneumoniae*** | | |  | ***Staphylococcus aureus*** | | |
|  | **CMT-** | **CMT+** |  |  | **CMT-** | **CMT+** |
| **mNGS-** | 158 | 3 |  | **mNGS-** | 172 | 1 |
| **mNGS+** | 6 | 13 |  | **mNGS+** | 4 | 3 |
| Kappa value=0.715, *P*=5.343e-22 | | | | Kappa value=0.532, *P*=1.010E-13 | | |
|  |  |  |  |  |  |  |
| ***Pseudomonas aeruginosa*** | | |  | ***Staphylococcus haemolyticus*** | | |
|  | **CMT-** | **CMT+** |  |  | **CMT-** | **CMT+** |
| **mNGS-** | 158 | 1 |  | **mNGS-** | 173 | 2 |
| **mNGS+** | 6 | 15 |  | **mNGS+** | 5 | 0 |
| Kappa value=0.790, *P*=8.652e-27 | | | | Kappa value=-0.016, *P*=0.810 | | |
|  |  |  |  |  |  |  |
| ***Streptococcus pneumoniae*** | | |  | ***Escherichia coli*** | |  |
|  | **CMT-** | **CMT+** |  |  | **CMT-** | **CMT+** |
| **mNGS-** | 163 | 0 |  | **mNGS-** | 174 | 3 |
| **mNGS+** | 17 | 0 |  | **mNGS+** | 0 | 3 |
| Kappa value=0, *P*=1 | | |  | Kappa value=0.659, *P*=5.149E-21 | | |

**Supplementary Table 2** Comparison of pathogens detected by mNGS between severe and non-severe patients with pneumonia.

| **Detected microorganisms by mNGS** | **Severe (n=142)** | **Non-severe (n=38)** | ***P* value** |
| --- | --- | --- | --- |
| **Bacteria** |  |  |  |
| *Corynebacterium striatum* | 31 (21.8%) | 6 (16.7%) | 0.495 |
| *Acinetobacter baumannii* | 28 (19.7%) | 8 (21.1%) | 0.855 |
| *Pseudomonas aeruginosa* | 21 (14.8%) | 0 (0.0%) | 0.008** |
| *Klebsiella pneumoniae* | 17 (12.0%) | 2 (5.3%) | 0.372 |
| *Streptococcus pneumoniae* | 12 (8.5%) | 5 (13.2%) | 0.378 |
| *Enterococcus faecium* | 5 (3.5%) | 4 (10.5%) | 0.096 |
| *Mycobacterium tuberculosis* | 6 (4.2%) | 2 (5.3%) | 0.676 |
| *Staphylococcus aureus* | 7 (4.9%) | 0 (0.0%) | 0.348 |
| *Haemophilus influenzae* | 2 (1.4%) | 3 (7.9%) | 0.064 |
| *Staphylococcus epidermidis* | 3 (2.1%) | 2 (5.3%) | 0.285 |
| *Tropheryma whipplei* | 4 (2.8%) | 0 (0.0%) | 0.58 |
| *Escherichia coli* | 2 (1.4%) | 1 (2.6%) | 0.511 |
| *Haemophilus parainfluenzae* | 1 (0.7%) | 2 (5.3%) | 0.113 |
| *Streptococcus parasanguinis* | 3 (2.1%) | 0 (0.0%) | 1 |
| *Corynebacterium propinquum* | 1 (0.7%) | 1 (2.6%) | 0.379 |
| *Moraxella catarrhalis* | 1 (0.7%) | 1 (2.6%) | 0.379 |
| *Mycoplasma pneumoniae* | 2 (1.4%) | 0 (0.0%) | 1 |
| *Serratia marcescens* | 0 (0.0%) | 2 (5.3%) | 0.044* |
| *Achromobacter xylosoxidans* | 0 (0.0%) | 1 (2.6%) | 0.211 |
| *Chlamydia psittaci* | 1 (0.7%) | 0 (0.0%) | 1 |
| *Corynebacterium accolens* | 1 (0.7%) | 0 (0.0%) | 1 |
| *Corynebacterium jeikeium* | 0 (0.0%) | 1 (2.6%) | 0.211 |
| *Corynebacterium urealyticum* | 1 (0.7%) | 0 (0.0%) | 1 |
| *Elizabethkingia anophelis* | 1 (0.7%) | 0 (0.0%) | 1 |
| *Elizabethkingia meningoseptica* | 1 (0.7%) | 0 (0.0%) | 1 |
| *Enterobacter aerogenes* | 1 (0.7%) | 0 (0.0%) | 1 |
| *Enterobacter cloacae* | 1 (0.7%) | 0 (0.0%) | 1 |
| *Enterococcus faecalis* | 1 (0.7%) | 0 (0.0%) | 1 |
| *Klebsiella aerogenes* | 0 (0.0%) | 1 (2.6%) | 0.211 |
| *Mycoplasma orale* | 1 (0.7%) | 0 (0.0%) | 1 |
| *Nocardia cyriacigeorgica* | 1 (0.7%) | 0 (0.0%) | 1 |
| *Nocardia farcinica* | 1 (0.7%) | 0 (0.0%) | 1 |
| *Staphylococcus haemolyticus* | 1 (0.7%) | 0 (0.0%) | 1 |
| *Stenotrophomonas maltophilia* | 1 (0.7%) | 0 (0.0%) | 1 |
| *Streptococcus australis* | 0 (0.0%) | 1 (2.6%) | 0.211 |
| *Streptococcus salivarius* | 0 (0.0%) | 1 (2.6%) | 0.211 |
| *Ureaplasma urealyticum* | 1 (0.7%) | 0 (0.0%) | 1 |
| **Fungi** |  |  |  |
| *Candida albicans* | 38 (26.8%) | 5 (13.2%) | 0.081 |
| *Pneumocystis jirovecii* | 8 (5.6%) | 1 (2.6%) | 0.687 |
| *Aspergillus fumigatus* | 4 (2.8%) | 4 (10.5%) | 0.063 |
| *Aspergillus flavus* | 5 (3.5%) | 2 (5.3%) | 0.64 |
| *Candida glabrata* | 3 (2.1%) | 1 (2.6%) | 1 |
| *Candida parapsilosis* | 4 (2.8%) | 0 (0.0%) | 0.58 |
| *Aspergillus niger* | 1 (0.7%) | 0 (0.0%) | 1 |
| *Aspergillus terreus* | 0 (0.0%) | 1 (2.6%) | 0.211 |
| *Candida orthopsilosis* | 1 (0.7%) | 0 (0.0%) | 1 |
| *Candida tropicalis* | 1 (0.7%) | 0 (0.0%) | 1 |
| *Malassezia restricta* | 1 (0.7%) | 0 (0.0%) | 1 |
| *Mucor racemosus* | 1 (0.7%) | 0 (0.0%) | 1 |
| **Virus** |  |  |  |
| *Human herpesvirus 1* | 37 (26.1%) | 2 (5.3%) | 0.004** |
| *Human herpesvirus 5* | 15 (10.6%) | 6 (15.8%) | 0.373 |
| *Human herpesvirus 4* | 14 (9.9%) | 1 (2.6%) | 0.199 |
| *Torque teno virus* | 7 (4.9%) | 5 (13.2%) | 0.071 |
| *Human herpesvirus 7* | 3 (2.1%) | 0 (0.0%) | 1 |
| *Human herpesvirus 6B* | 2 (1.4%) | 0 (0.0%) | 1 |
| *Influenza B virus* | 1 (0.7%) | 1 (2.6%) | 0.379 |
| *Betapapillomavirus 1* | 0 (0.0%) | 1 (2.6%) | 0.211 |
| *Hepatitis B virus* | 1 (0.7%) | 0 (0.0%) | 1 |
| *Human adenovirus B* | 1 (0.7%) | 0 (0.0%) | 1 |
| *Human coronavirus OC43* | 1 (0.7%) | 0 (0.0%) | 1 |
| *Molluscum contagiosum virus* | 0 (0.0%) | 1 (2.6%) | 0.211 |

Footnote: **P*<0.05, ***P*<0.01

**Supplementary Table 3** Comparison of pathogens detected by mNGS between immunocompetent and immunocompromised patients with pneumonia.

| **Detected microorganisms by mNGS** | **Immunocompetent (n=112)** | **Immunocompromised (n=68)** | ***P* value** |
| --- | --- | --- | --- |
| **Bacteria** |  |  |  |
| *Corynebacterium striatum* | 30 (26.8%) | 7 (10.3%) | 0.008** |
| *Acinetobacter baumannii* | 25 (22.3%) | 11 (16.2%) | 0.318 |
| *Pseudomonas aeruginosa* | 15 (13.4%) | 6 (8.8%) | 0.355 |
| *Klebsiella pneumoniae* | 13 (11.6%) | 6 (8.8%) | 0.556 |
| *Streptococcus pneumoniae* | 14 (12.5%) | 3 (4.4%) | 0.113 |
| *Enterococcus faecium* | 5 (4.5%) | 4 (5.9%) | 0.731 |
| *Mycobacterium tuberculosis* | 4 (3.6%) | 4 (5.9%) | 0.478 |
| *Staphylococcus aureus* | 7 (6.3%) | 0 (0%) | 0.046 |
| *Haemophilus influenzae* | 5 (4.5%) | 0 (0%) | 0.158 |
| *Staphylococcus epidermidis* | 3 (2.7%) | 2 (2.9%) | 1 |
| *Staphylococcus haemolyticus* | 2 (1.8%) | 3 (4.4%) | 0.368 |
| *Tropheryma whipplei* | 1 (0.9%) | 3 (4.4%) | 0.152 |
| *Escherichia coli* | 2 (1.8%) | 1 (1.5%) | 1 |
| *Haemophilus parainfluenzae* | 3 (2.7%) | 0 (0%) | 0.291 |
| *Streptococcus parasanguinis* | 1 (0.9%) | 2 (2.9%) | 0.558 |
| *Corynebacterium propinquum* | 2 (1.8%) | 0 (0%) | 0.527 |
| *Moraxella catarrhalis* | 2 (1.8%) | 0 (0%) | 0.527 |
| *Mycoplasma pneumoniae* | 2 (1.8%) | 0 (0%) | 0.527 |
| *Serratia marcescens* | 2 (1.8%) | 0 (0%) | 0.527 |
| *Achromobacter xylosoxidans* | 1 (0.9%) | 0 (0%) | 1 |
| *Chlamydia psittaci* | 1 (0.9%) | 0 (0%) | 1 |
| *Elizabethkingia anophelis* | 1 (0.9%) | 0 (0%) | 1 |
| *Elizabethkingia meningoseptica* | 1 (0.9%) | 0 (0%) | 1 |
| *Enterobacter aerogenes* | 1 (0.9%) | 0 (0%) | 1 |
| *Enterobacter cloacae* | 1 (0.9%) | 0 (0%) | 1 |
| *Klebsiella aerogenes* | 1 (0.9%) | 0 (0%) | 1 |
| *Nocardia cyriacigeorgica* | 1 (0.9%) | 0 (0%) | 1 |
| *Stenotrophomonas maltophilia* | 1 (0.9%) | 0 (0%) | 1 |
| *Streptococcus australis* | 1 (0.9%) | 0 (0%) | 1 |
| *Streptococcus salivarius* | 1 (0.9%) | 0 (0%) | 1 |
| *Ureaplasma urealyticum* | 1 (0.9%) | 0 (0%) | 1 |
| *Corynebacterium accolens* | 0 (0.0%) | 1 (1.5%) | 0.378 |
| *Corynebacterium jeikeium* | 0 (0.0%) | 1 (1.5%) | 0.378 |
| *Corynebacterium urealyticum* | 0 (0.0%) | 1 (1.5%) | 0.378 |
| *Enterococcus faecalis* | 0 (0.0%) | 1 (1.5%) | 0.378 |
| *Mycoplasma orale* | 0 (0.0%) | 1 (1.5%) | 0.378 |
| *Nocardia farcinica* | 0 (0.0%) | 1 (1.5%) | 0.378 |
| **Fungi** |  |  |  |
| *Candida albicans* | 28 (25.0%) | 15 (22.1%) | 0.654 |
| *Pneumocystis jirovecii* | 1 (0.9%) | 8 (11.8%) | 0.002** |
| *Aspergillus fumigatus* | 5 (4.5%) | 3 (4.4%) | 1 |
| *Aspergillus flavus* | 5 (4.5%) | 2 (2.9%) | 0.712 |
| *Candida glabrata* | 3 (2.7%) | 1 (1.5%) | 1 |
| *Candida parapsilosis* | 3 (2.7%) | 1 (1.5%) | 1 |
| *Aspergillus niger* | 1 (0.9%) | 0 (0%) | 1 |
| *Aspergillus terreus* | 1 (0.9%) | 0 (0%) | 1 |
| *Malassezia restricta* | 1 (0.9%) | 0 (0%) | 1 |
| *Mucor racemosus* | 1 (0.9%) | 0 (0%) | 1 |
| *Candida orthopsilosis* | 0 (0.0%) | 1 (1.5%) | 0.378 |
| *Candida tropicalis* | 0 (0.0%) | 1 (1.5%) | 0.378 |
| **Virus** |  |  |  |
| *Human herpesvirus 1* | 24 (21.4%) | 15 (22.1%) | 0.921 |
| *Human herpesvirus 5* | 11 (9.8%) | 10 (14.7%) | 0.322 |
| *Human herpesvirus 4* | 6 (5.4%) | 9 (13.2%) | 0.064 |
| *Torque teno virus* | 5 (4.5%) | 7 (10.3%) | 0.128 |
| *Human herpesvirus 7* | 0 (0.0%) | 3 (4.4%) | 0.052 |
| *Human herpesvirus 6B* | 0 (0.0%) | 2 (2.9%) | 0.141 |
| *Influenza B virus* | 1 (0.9%) | 1 (1.5%) | 1 |
| *Betapapillomavirus 1* | 1 (0.9%) | 0 (0%) | 1 |
| *Hepatitis B virus* | 1 (0.9%) | 0 (0%) | 1 |
| *Human adenovirus B* | 1 (0.9%) | 0 (0%) | 1 |
| *Molluscum contagiosum virus* | 1 (0.9%) | 0 (0%) | 1 |
| *Human coronavirus OC43* | 0 (0.0%) | 1 (1.5%) | 0.378 |

Footnote: ***P*<0.01

**Supplementary Table 4** Resistance mechanism, antibiotic and number of antibiotic resistance genes in 50 patients with pneumonia

| **Drug Class** | **Drugs** | **Resistance Mechanism** | **AMR Gene Family** | **ARG** | **No.** |
| --- | --- | --- | --- | --- | --- |
| **Aminoglycoside** | aminoglycoside | Antibiotic inactivation | APH(3'') | *APH(3'')-Ib* | 22 |
| APH(6) | *APH(6)-Id* | 22 |
| APH(3') | *APH(3')-Ia* | 18 |
| APH(2''), AAC(6') | *AAC(6')-Ie-APH(2'')-Ia* | 7 |
| [AAC(6')](https://card.mcmaster.ca/ontology/36484) | *AAC(6')-Ii* | 2 |
| AAC(3) | *AAC(3)-IV* | 1 |
| ANT(3'') | *aadA16* | 1 |
| APH(3') | *APH(3')-IIb* | 6 |
| APH(3') | *APH(3')-IIIa* | 2 |
| APH(4) | *APH(4)-Ia* | 1 |
| Antibiotic efflux | SMR antibiotic efflux pump | *emrE* | 4 |
| Antibiotic target alteration | rRNA methyltransferase | *rmtB* | 1 |
| *armA* | 10 |
| **β-lactam** | penam | Antibiotic inactivation | blaZ beta-lactamase | *PC1 beta-lactamase (blaZ)* | 3 |
| carbapenem, cephalosporin, cephamycin, monobactams, penam | antibiotic target replacement | methicillin resistant PBP2 | *mecA* | 4 |
| *mecR1* | 1 |
| cephamycin, cephalosporin, penem, penam, carbapenem, monobactam | Reduced permeability to antibiotic | Reduced permeability to beta-lactams | *OmpK37* | 3 |
| **MLSB** | lincosamide | Antibiotic inactivation | LNU | *lnuC* | 5 |
| macrolide | MPH | *mphA* | 1 |
| MPH | *mphC* | 1 |
| MPH | *mphE* | 13 |
| streptogramin, macrolide, lincosamide | Antibiotic target alteration | Erm 23S ribosomal RNA methyltransferase | *ermB* | 13 |
| *ermC* | 3 |
| *ermX* | 25 |
| *ErmF* | 3 |
| lincosamide, macrolide | non-erm 23S ribosomal RNA methyltransferase (G748) | *RlmA(II)* | 1 |
| **Tetracycline** | tetracycline | Antibiotic target protection | tetracycline-resistant ribosomal protection protein | *tetM* | 15 |
| *tetQ* | 2 |
| *tetW* | 7 |
| Antibiotic efflux | MFS antibiotic efflux pump | *tet(38)* | 2 |
| *tet(K)* | 1 |
| *tet(33)* | 1 |
| *tet(A)* | 2 |
| *tet(B)* | 15 |
| *tet(L)* | 2 |
| tetracycline, glycylcycline | RND antibiotic efflux pump | *adeA* | 15 |
| *adeB* | 15 |
| *adeC* | 15 |
| *adeR* | 11 |
| *adeS* | 10 |
| MATE transporter | *mepR* | 1 |
| *mepA* | 2 |
| **Fluoroquinolone** | fluoroquinolone | Antibiotic efflux | MFS efflux pump | *pmrA* | 1 |
| *qacA* | 1 |
| *AbaQ* | 12 |
| *norA(ARO:3004667)* | 1 |
| ABC efflux pump | *patA* | 1 |
| *patB* | 1 |
| Antibiotic inactivation | ciprofloxacin phosphotransferase | *CrpP* | 1 |
| **Diaminopyrimidine** | diaminopyrimidine | Antibiotic target replacement | trimethoprim resistant dihydrofolate reductase dfr | *dfrC* | 2 |
| *dfrA14* | 2 |
| *dfrA27* | 1 |
| *dfrA28* | 1 |
| *dfrG* | 3 |
| **Fosfomycin** | fosfomycin | Antibiotic inactivation | fosfomycin thiol transferase | *fosA* | 4 |
| *FosA5* | 2 |
| antibiotic efflux | MFS antibiotic efflux pump | *AbaF* | 15 |
| **Rifamycin** | rifamycin | antibiotic inactivation | rifampin ADP-ribosyltransferase (Arr) | *arr-3* | 1 |
| **Phenicol** | phenicol | Antibiotic efflux | MFS efflux pump | *cmx* | 12 |
| *pp-flo* | 1 |
| RND antibiotic efflux pump | *mexM* | 7 |
| *mexN* | 8 |
| Antibiotic inactivation | chloramphenicol acetyltransferase (CAT) | *catB7* | 6 |
| *catB8* | 2 |
| *catII from Escherichia coli K-12* | 1 |
| **Polypeptide** | polypeptide | Antibiotic target alteration | defensin resistant mprF | *mprF* | 1 |
| intrinsic colistin resistant phosphoethanolamine transferase | *ICR-Mc* | 1 |
| pmr phosphoethanolamine transferase | *arnA* | 8 |
| *basS* | 8 |
| **Unclassified** | mupirocin | Antibiotic target alteration | antibiotic resistant isoleucyl-tRNA synthetase (ileS) | *mupA* | 2 |
| triclosan | Antibiotic efflux | RND efflux pump | *TriC* | 9 |
| *TriA* | 7 |
| *TriB* | 8 |
| *OpmH* | 8 |
| bicyclomycin | MFS antibiotic efflux pump | *bcr-1* | 7 |
| **Multi-drug** | macrolide, fluoroquinolone | Antibiotic efflux | MFS efflux pump | *efmA* | 2 |
| acridine dye, fluoroquinolone | *norA (ARO:3000391)* | 2 |
| *arlR* | 1 |
| *arlS* | 1 |
| acridine dye, macrolide | *AmvA* | 14 |
| aminoglycoside, diaminopyrimidine, macrolide, Oxazolidinone, phenicol | *LmrS* | 1 |
| aminoglycoside, carbapenem, cephalosporin, fluoroquinolone, macrolide, penam, penem, polypeptide | *KpnG* | 3 |
| aminoglycoside, cephalosporin, macrolide, polypeptide, rifamycin, tetracycline | *KpnE* | 2 |
| *KpnF* | 2 |
| tetracycline, fluoroquinolone | RND efflux pump | *adeH* | 15 |
| *adeL* | 15 |
| *adeG* | 15 |
| *adeF* | 15 |
| aminocoumarin, aminoglycoside, carbapenem, cephalosporin, cephamycin, diaminopyrimidine, fluoroquinolone, macrolide, monobactam, penam, penem, polypeptide, phenicol, sulfonamide, tetracycline | *CpxR* | 5 |
| phenicol, diaminopyrimidine, fluoroquinolone | *mexF* | 8 |
| *MexE* | 7 |
| *OprN* | 7 |
| diaminopyrimidine, rifamycin, penem, tetracycline, phenicol, carbapenem, macrolide, lincosamide, fluoroquinolone , cephalosporin | *adeI* | 15 |
| *adeJ* | 15 |
| *adeK* | 15 |
| *adeN* | 11 |
| peptide, penam, diaminopyrimidine, sulfonamide, phenicol, fluoroquinolone, cephalosporin, macrolide, tetracycline, monobactam, carbapenem, aminocoumarin, penem, cephamycin | *mexB* | 8 |
| *MexA* | 7 |
| *ArmR* | 2 |
| tetracycline, acridine dye, macrolide, phenicol, fluoroquinolone | *mexW* | 9 |
| *mexV* | 7 |
| tetracycline, nitrofuran, fluoroquinolone, glycylcycline, diaminopyrimidine | *oqxB* | 2 |
| *oqxA* | 2 |
| acridine dye, aminoglycoside, carbapenem, cephalosporin, cephamycin, fluoroquinolone, macrolide, penicillin, phenicol, tetracycline | *mexX* | 6 |
| *mexY* | 7 |
| aminocoumarin, aminoglycoside, cephalosporin, diaminopyrimidine , fluoroquinolone, macrolide, penam, phenicol, tetracycline | *MexC* | 6 |
| *MexD* | 8 |
| *OprJ* | 7 |
| acridine dye, aminocoumarin, aminoglycoside, carbapenem, cephalosporin, cephamycin, diaminopyrimidine, fluoroquinolone, macrolide, monobactam, penam, penem, polypeptide, phenicol, sulfonamide, tetracycline | *OprM* | 8 |
| acridine dye, fluoroquinolone, tetracycline | *mexG* | 4 |
| *mexH* | 7 |
| *mexI* | 9 |
| *opmD* | 8 |
| acridine dye, carbapenem, diaminopyrimidine, macrolide, phenicol, tetracycline | *mexP* | 7 |
| *mexQ* | 9 |
| *opmE* | 7 |
| aminocoumarin, macrolide, monobactam, tetracycline | *MuxA* | 6 |
| *MuxB* | 8 |
| *MuxC* | 8 |
| *OpmB* | 8 |
| macrolide, tetracycline, triclosan | *mexJ* | 6 |
| *mexK* | 9 |
| *mexL* | 6 |
| acridine dye, fluoroquinolone, triclosan | MATE transporter | *abeM* | 15 |
| acridine dye, fluoroquinolone | *hmrM* | 1 |
| aminoglycoside, benzalkonium chloride, fluoroquinolone | *PmpM* | 7 |
| acridine dye, cephalosporin, fluoroquinolone, penam, polypeptide, tetracycline | ABC antibiotic efflux pump, MFS antibiotic efflux pump | *mgrA* | 1 |
| aminocoumarin, macrolide |  | SMR antibiotic efflux pump | *abeS* | 8 |
| tetracycline, lincosamide, phenicol, pleuromutilin, oxazolidinone, streptogramin, macrolide | Antibiotic target protection | ABC-F ATP-binding cassette ribosomal protection protein | *msrE* | 13 |
| *msrA* | 1 |
| acridine dye, cephalosporin, fluoroquinolone, glycylcycline, penam, phenicol, rifamycin, tetracycline, triclosan | antibiotic efflux, antibiotic target alteration | ABC antibiotic efflux pump, MFS antibiotic efflux pump, RND antibiotic efflux pump | *soxR* | 4 |
| aminoglycoside, fluoroquinolone, rifamycin, tetracycline | Antibiotic inactivation | LAP beta-lactamase | *LAP-1* | 1 |
| sulfonamide, sulfone | Antibiotic target replacement | sulfonamide resistant sul | *sul1* | 7 |
| *sul2* | 7 |

**Supplementary Figure**





**Supplementary Figure 1** The positive rate of detected microorganisms by conventional microbiological tests (CMT) using different sample type including sputum, plasma, urine, hydrothorax and ascite, cerebrospinal fluid, bronchial alveolar lavage fluid (BALF) and bile.
